# Supplementary material for: Changing knowledge, attitudes and behaviours towards cytomegalovirus in pregnancy through film-based antenatal education: a feasibility randomised controlled trial of a digital educational intervention
Source: Springer Nature journal article supplement (doi:10.1186/s12884-021-03979-z), 2021-08-18
Supplement: MOESM7 [file 12884_2021_3979_MOESM7_ESM.pdf]

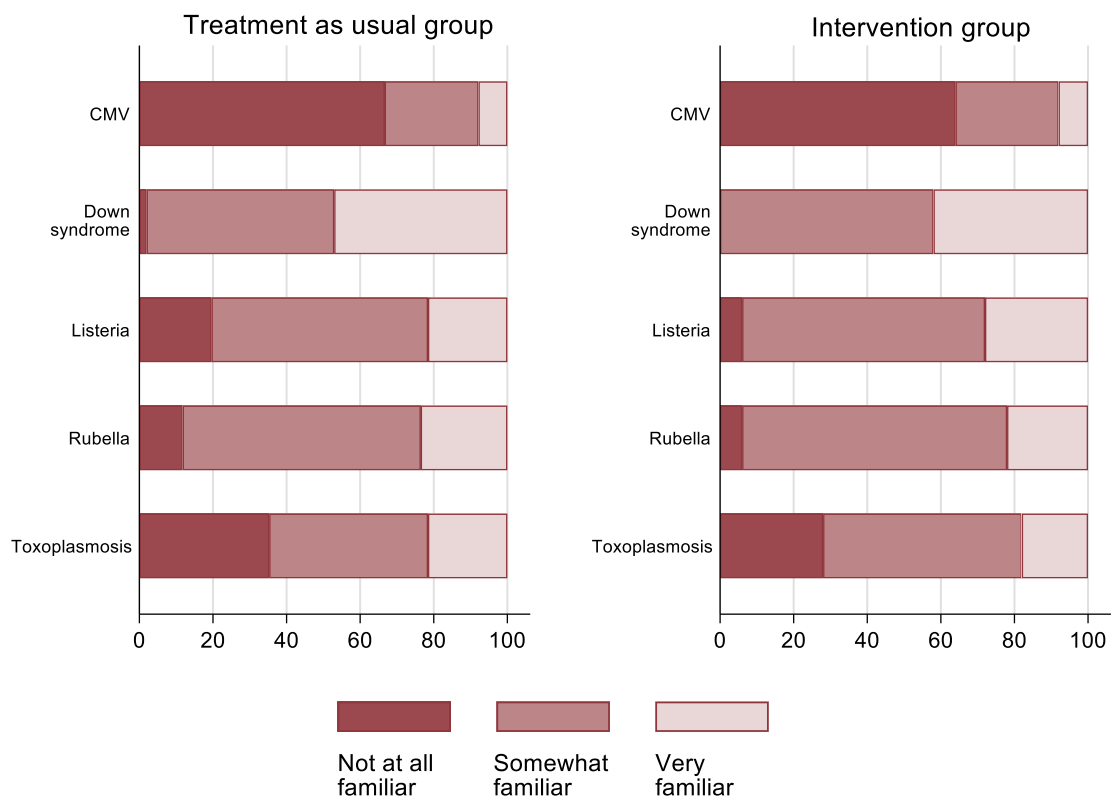

CMV Cytomegalovirus

**Supplementary figure 1: Familiarity of participants with conditions affecting newborn infants**
